# Supplementary material
Source: PubMed Central journal article supplement (PMC8581072)
Supplement: NIHMS1706050-supplement-1.pdf [file NIHMS1706050-supplement-1.pdf]

433

**Supplemental Legend**

434 **Supplemental Figure 1.** Cohort Development. The 699 patients who were potentially  
435 eligible and 160 patients in CTP were matched. CTP indicates care transition program;  
436 SNF, skilled nursing facility.

437

438

Figure One Supplemental Material

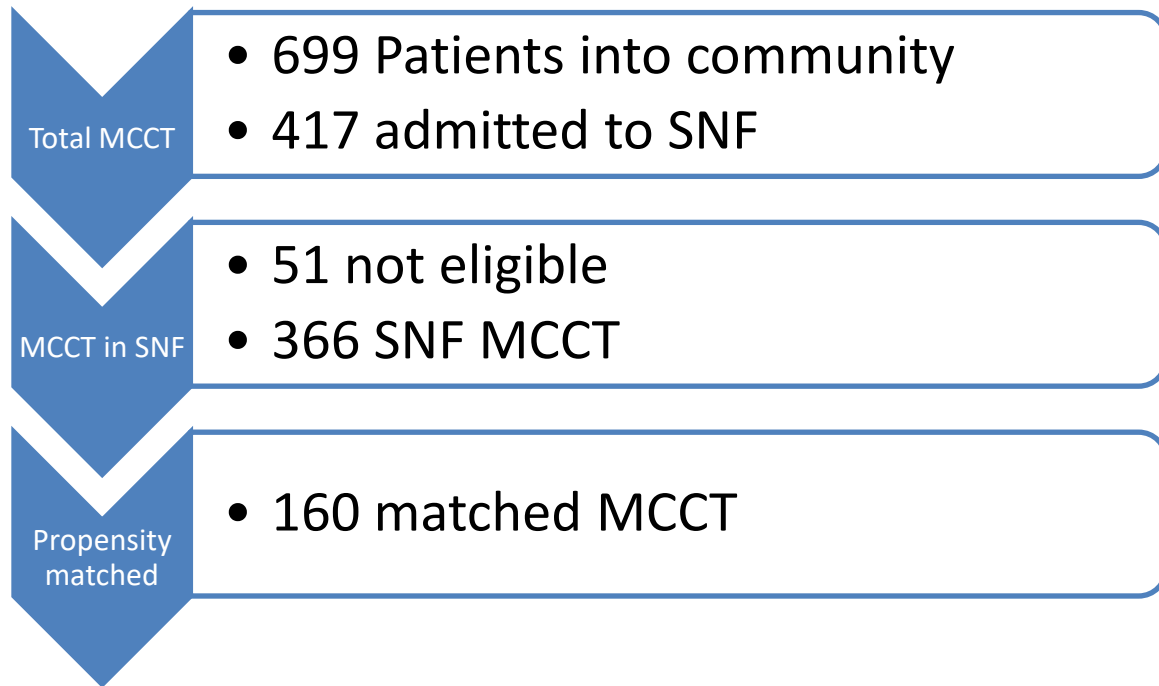

**Supplemental Table 1.** Elder Risk Assessment Index

| <b>Predictor</b>                         | <b>Score</b> |
|------------------------------------------|--------------|
| Married/partner                          | -1           |
| Age, y                                   |              |
| 70-79                                    | 1            |
| 80-89                                    | 3            |
| ≥90                                      | 7            |
| 1-5 hospital d in previous 2 y           | 5            |
| ≥6 hospital d in previous 2 y            | 11           |
| History                                  |              |
| Diabetes                                 | 2            |
| Coronary artery disease/MI/heart failure | 3            |
| Stroke                                   | 2            |
| COPD                                     | 5            |
| Cancer                                   | 1            |
| Dementia                                 | 3            |

Abbreviations: COPD, chronic obstructive lung disease; MI, myocardial infarction.
